# Supplementary material for: Reducing the Flocculation of Milk Tea Using Different Stabilizers to Regulate Tea Proteins
Source: MDPI journal article supplement (doi:10.3390/foods12071484), 2023-04-01
Supplement: s1 [file s1]

**Table S1. Factor level table for stability test of milk tea**

| Levels | Factors            |                    |                    |
|--------|--------------------|--------------------|--------------------|
|        | X <sub>1</sub> (%) | X <sub>2</sub> (%) | X <sub>3</sub> (%) |
|        |                    |                    |                    |
| -1     | 0.02               | 0.02               | 0.02               |
| 0      | 0.03               | 0.03               | 0.03               |
| 1      | 0.04               | 0.04               | 0.04               |

**Table S2. Box - Behnken design milk tea stabilizer combination formula and results**

| Run | Arabic gum (%) | $\beta$ -CD (%) | AGAR (%) | Stability<br>coefficient (R) |
|-----|----------------|-----------------|----------|------------------------------|
| 1   | 0.02           | 0.03            | 0.02     | 0.71577                      |
| 2   | 0.03           | 0.03            | 0.03     | 0.75798                      |
| 3   | 0.04           | 0.02            | 0.03     | 0.76393                      |
| 4   | 0.03           | 0.04            | 0.04     | 0.70619                      |
| 5   | 0.03           | 0.03            | 0.03     | 0.76338                      |
| 6   | 0.02           | 0.03            | 0.04     | 0.68193                      |
| 7   | 0.03           | 0.03            | 0.03     | 0.77188                      |
| 8   | 0.04           | 0.03            | 0.02     | 0.72977                      |
| 9   | 0.03           | 0.02            | 0.04     | 0.748                        |
| 10  | 0.03           | 0.04            | 0.02     | 0.74308                      |
| 11  | 0.04           | 0.03            | 0.04     | 0.7479                       |
| 12  | 0.03           | 0.02            | 0.02     | 0.74384                      |
| 13  | 0.03           | 0.03            | 0.03     | 0.76142                      |
| 14  | 0.03           | 0.03            | 0.03     | 0.75689                      |
| 15  | 0.02           | 0.04            | 0.03     | 0.70784                      |
| 16  | 0.04           | 0.04            | 0.03     | 0.72093                      |
| 17  | 0.02           | 0.02            | 0.03     | 0.71247                      |

**Table S3. Variance analysis of response surface test results**

| Source                        | Sum of Squares         | Degree of freedom | Mean Square            | F-value | p-value<br>Prob > F | Comment         |
|-------------------------------|------------------------|-------------------|------------------------|---------|---------------------|-----------------|
| Model                         | 0.010                  | 9                 | $1.153 \times 10^{-3}$ | 38.27   | < 0.0001            | significant     |
| X <sub>1</sub>                | $2.611 \times 10^{-3}$ | 1                 | $2.611 \times 10^{-3}$ | 86.66   | < 0.0001            |                 |
| X <sub>2</sub>                | $1.017 \times 10^{-3}$ | 1                 | $1.017 \times 10^{-3}$ | 33.75   | 0.0007              |                 |
| X <sub>3</sub>                | $2.934 \times 10^{-4}$ | 1                 | $2.934 \times 10^{-4}$ | 9.74    | 0.0168              |                 |
| X <sub>1</sub> X <sub>2</sub> | $3.680 \times 10^{-4}$ | 1                 | $3.680 \times 10^{-4}$ | 12.21   | 0.0101              |                 |
| X <sub>1</sub> X <sub>3</sub> | $6.753 \times 10^{-4}$ | 1                 | $6.753 \times 10^{-4}$ | 22.41   | 0.0021              |                 |
| X <sub>2</sub> X <sub>3</sub> | $4.214 \times 10^{-4}$ | 1                 | $4.214 \times 10^{-4}$ | 13.98   | 0.0073              |                 |
| X <sub>1</sub> <sup>2</sup>   | $2.896 \times 10^{-3}$ | 1                 | $2.896 \times 10^{-3}$ | 96.13   | < 0.0001            |                 |
| X <sub>2</sub> <sup>2</sup>   | $4.038 \times 10^{-4}$ | 1                 | $4.038 \times 10^{-4}$ | 13.40   | 0.0081              |                 |
| X <sub>3</sub> <sup>2</sup>   | $1.251 \times 10^{-3}$ | 1                 | $1.251 \times 10^{-3}$ | 41.54   | 0.0004              |                 |
| Residual                      | $2.109 \times 10^{-4}$ | 7                 | $3.013 \times 10^{-5}$ |         |                     | not significant |
| Lack of Fit                   | $6.921 \times 10^{-5}$ | 3                 | $2.307 \times 10^{-5}$ | 0.65    | 0.6226              |                 |
| Pure Error                    | $1.417 \times 10^{-4}$ | 4                 | $3.542 \times 10^{-5}$ |         |                     |                 |
| Cor Total                     | 0.011                  | 16                |                        |         |                     |                 |
| R <sup>2</sup>                |                        |                   |                        |         | 0.9801              |                 |
| R <sup>2</sup> <sub>Adj</sub> |                        |                   |                        |         | 0.9545              |                 |
